# Supplementary material for: Cathepsin B Is Upregulated and Mediates ECM Degradation in Colon Adenocarcinoma HT29 Cells Overexpressing Snail
Source: PubMed Central journal article supplement (PMC6468499; doi:10.3390/cells8030203), 2019-02-27
Supplement: cells-08-00203-s001.pdf [file cells-08-00203-s001.pdf]

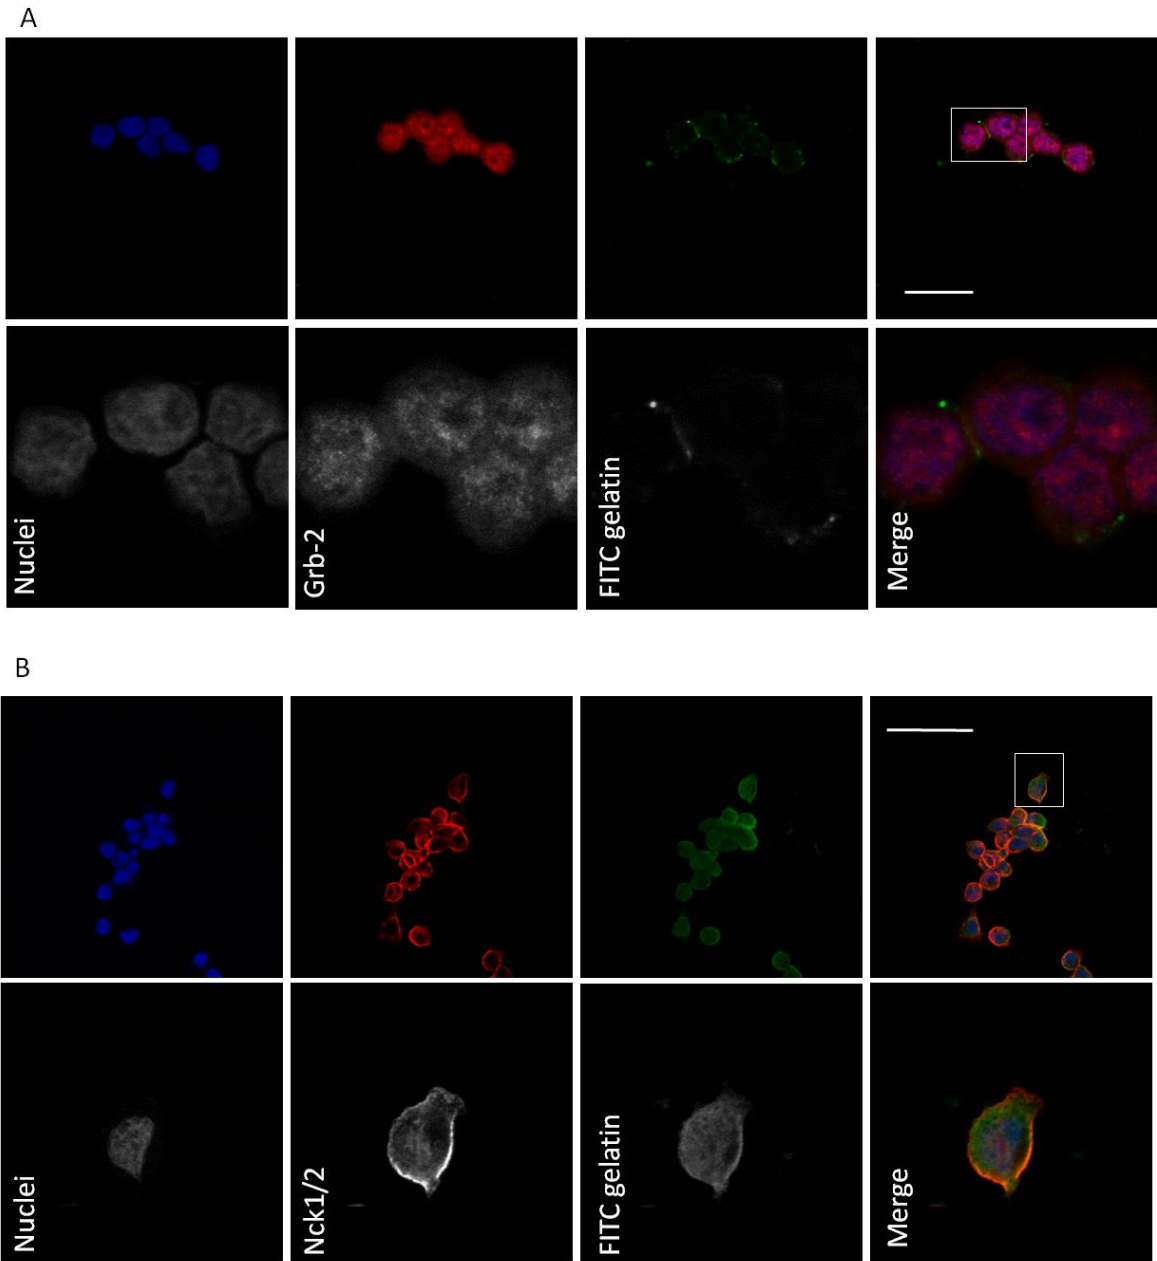

**S.1. Invadosomes structures in HT-29 control cells.** Cellular localization of invadosome related protein Grb-2 (A), no accumulation of Grb-2 (red) with FITC-gelatin degradation (green). Nck1/2 co-localization with gelatin degradation observed on focal – XY axis (B)

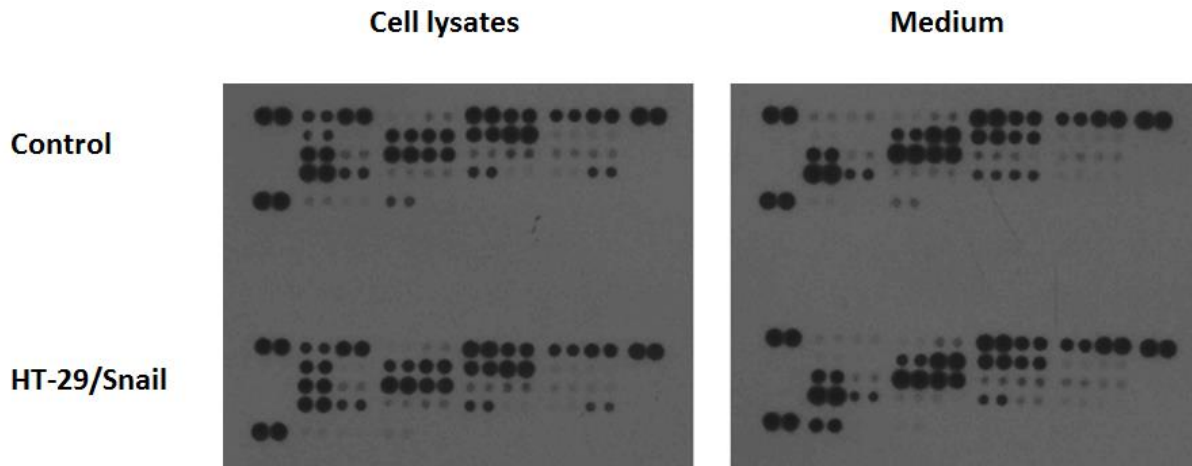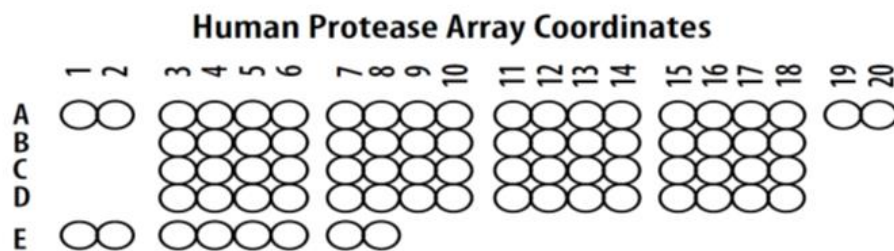

**S.2. The representative image of Proteome Profiler Human Protease Array Kit (R&D System, ARY021) of medium or cell lysates from HT-29 control cells vs. HT-29/Snail. A1, A2 Reference Spots; A3, A4 ADAM8 Ectodomain MS2, CD156a; A5, A6 ADAM9 Ectodomain MDC9, meltrin  $\gamma$ ; A7, A8 ADAMTS1 Proform METH1; A9, A10 ADAMTS13 Active von Willebrand factor-cleaving protease; A11, A12 Cathepsin A Proform & Active CTSA, Lysosomal Carboxypeptidase A; A13, A14 Cathepsin B Proform CTSE, APPS, CPSB; A15, A16 Cathepsin C Proform & Active CTSC; A17, A18 Cathepsin D Proform & Active CTSD, CPSD; A19, A20 Reference Spots; B3, B4 Cathepsin E Proform & Active CTSE, CATE; B5, B6 Cathepsin L Proform & Active CTSL, CATL, MEP, Cathepsin L1; B7, B8 Cathepsin S Proform & Active CTSS; B9, B10 Cathepsin V Proform & Active CTSV, CTSL2, CTSU, Cathepsin L2; B11, B12 Cathepsin X/Z/P Proform & Active CTSX, CTSZ; B13, B14 DPPIV/CD26 Ectodomain ADABP, ADCP2; B15, B16 Kallikrein 3/PSA Proform & Active KLK3, hK3, KLK2A1; B17, B18 Kallikrein 5 Proform & Active KLK5, SCTE, KLKL2; C3, C4 Kallikrein 6 Proform & Active KLK6; C5, C6 Kallikrein 7 Proform & Active KLK7, SCCE, PRSS6, hK7; C7, C8 Kallikrein 10 Proform & Active KLK10, NES1, PRSSL1; C9, C10 Kallikrein 11 Proform & Active KLK11, TLSP, PRSS20; C11, C12 Kallikrein 13 Proform & Active KLK13, KLKL4; C13, C14 MMP-1 Proform & Active Collagenase 1, Interstitial Collagenase; C15, C16 MMP-2 Proform & Active Gelatinase A; C17, C18 MMP-3 Proform & Active Stromelysin-1; D3, D4 MMP-7 Proform & Active Matrilysin, PUMP 1; D5, D6 MMP-8 Proform & Active Collagenase 2, Neutrophil Collagenase; D7, D8 MMP-9 Proform & Active Gelatinase B, CLG4B, GELB; D9, D10 MMP-12 Proform & Active Macrophage Elastase; D11, D12 MMP-13 Proform Collagenase 3; D13, D14 Neprilysin/CD10 Ectodomain MME, NEP, CALLA; D15, D16 Presenilin-1 N-Terminal Fragment PSEN1, AD3, PS-1; D17, D18 Proprotein Convertase 9 Active PC9, NARC1; E1, E2 Reference Spots; E3, E4 Proteinase 3 Active PRTN3, Myeloblastin; E5, E6 uPA/Urokinase Proform & Active Urokinase-type Plasminogen Activator, PLAU; E7, E8 Negative Control**
